# Supplementary material for: Cumulative Negative Impacts of Invasive Alien Species on Ma-Rine Ecosystems of the Aegean Sea
Source: Preprints.org preprint supplement (doi:10.20944/preprints202305.0215.v1), 2023-05-04
Supplement: Supplementary file 3 [file supplementary]

## Sheet: Matrix
Biotic Group	Species\Habitats	Seagrasses meadows	coralligenous formations	submarine caves	shallow soft substrates (0-60m)	deep soft substrates (60-200m)	soft substrates of the dysphotic zone (deeper than 200m)	shallow hard substrates (0-60 m)	deep hard substrates (60-200 m)	hard substrates of the dysphotic zone (deeper than 200m)	pelagic habitat	Comments	References
Macrophytes	Asparagopsis spp.	0	0	0	0	0	0	4	0	0	0	major (it can become dominant forming conspicuous monospecific stands that negatively affect native species and community structure; the newly formed habitat supports impoverished communities in comparison to native macroalgae); high strength of evidence (Natural experiments) medium strength of evidence (non-experimental based correlations, direct observations)	Zanolla et al., 2018; Navvarro-Borranco et al., 2018; Rueda et al., 2021; Mancuso et al., 2022
	Caulerpa cylindracea	1	2	0	4	0	0	4	0	0	0	hard susbtrate : moderate and major (The species may form compact multilayered mats up to 15 cm thick that trap sediment; an anoxic layer may develop underneath; its stolons can overgrow and eliminate other macroalgal or invertebrate species). soft and hard substrates: major (important changes in the biocommunities of the invaded habitats). Seagrass meadows: minor to moderate (C. cylindracea affe…	Argyrou et al. 1999; Piazzi et al. 2001, 2005, 2007; Dumay et al. 2002; Piazzi and Cinelli 2003; Piazzi and Ceccherelli 2006; Klein and Verlaque 2008; Kružić et al. 2008; Baldacconi and Corriero 2009; Žuljević et al. 2010; Klein and Verlaque 2011; Cebrian et al., 2012; Katsanevakis et al., 2014; Deudero et al., 2014; Pusceddu et al., 2016; Bulleri et al. 2017; Rizzo et al., 2017; Balestri et al.,…
	Codium fragile	0	0	0	0	0	0	2	0	0	0	major (can form dense, sponge-like, upright fronds and become a major structural feature of the invaded habitats, significantly alter the structure of the native community and compete with the other macroalgae; increases sedimentation; impedes the movement of large invertebrates and fish). medium strength of evidence (direct observations)	Schaffelke and Hewitt 2007; Tsiamis 2012; Ottero 2013; Katsanevakis et al., 2014
	Lophocladia lallemandii	4	1	0	0	0	0	4	0	0	0	major (This invasive ehodophyte creates dense turf mats that can overgrow a variety of habitats such as bare bedrocks, rocky reefs with macrophytic communities, Posidonia oceanica meadows, and coralligenous formations. As it becomes dominant, it homogenizes the substrate and displaces native biota, altering the community structure. In seagrass meadows, it invades as an epiphyte on seagrass leaves…	Ballesteros 2006; Ballesteros et al. 2007; Sureda et al. 2008; Deudero et al. 2010; Bedini et al. 2011, 2015
	Stypopodium schimperi	0	0	0	0	0	0	2	0	0	0	major (Its flat foliose formations can cover large areas on rocky substrates and can monopolize the habitat, dominating the macroalgal community and altering community structure); medium strength of evidence (direct observations)	Tsiamis 2012; Katsanevakis et al., 2014
	Womersleyella setacea	4	4	0	0	0	0	4	0	0	0	major (The invasive rhodophyte creates dense turf carpets that monopolize rocky substrates, coralligenous formations and Posidonia oceanica meadows. This alters the composition of benthic communities and has negative impacts on native species through competition, overgrowth, reduced light penetration, and increased sedimentation); high strength of evidence (manipulative and natural experiments)	Airoldi 2000; Piazzi and Cinelli 2000, 2003 2003; Piazzi and Balata 2009; Cebrian et al. 2012; Linares et al. 2012; de Caralt and Cebrian 2013; Bedini et al., 2015; Kersting et al., 2015; Piazzi and Cecchereli, 2020
	Halophila stipulacea	1	0	0	0	0	0	0	0	0	0	moderate (Can replace native seagrass Cymodocea nodosa); medium strength of evidence (non-experimental based correlations)	Sghaier et al.,2014
Fish	Fistularia commersonii	1	0	0	1	0	0	1	0	0	0	moderate (The bluespotted cornetfish is a voracious carnivore that can affect native species populations through its predation); medium strength of evidence (non-experimental based correlations), low strength of evidence (expert judgement)	Kalogirou et al. 2007; Pinnegar et al., 2014
	Lagocephalus sceleratus	1	0	0	1	0	0	1	0	0	0	minor to major (a voracious predator of native cephalopods, crustaceans and fish. Negative effects of L. sceleratus on native demershal fish with high retention rate); medium strength of evidence (modelling, direct observations), limited strength of evidence (expert judgement)	Pancucci-Papadopoulou et al. 2012; Kalogirou 2013; Saygu et al., 2020
	Pterois miles	0	0	0	0	0	0	1	1	0	0	major impact (opportunistic predators that can cause population declines of native species due to predation and competition); low strength of evidence (expert judgement)	Green et al., 2012; Hixon et al., 2016; Galanidi et al., 2018; Savva et al., 2020
	Siganus luridus	0	0	0	0	0	0	8	0	0	0	massive (Can overgraze and deplete algal vegetation of shallow rocky reefs to the point that they shift the ecosystem state from algal forests to isolated barren grounds or turf-dominated communities of low complexity); high strength of evidence (manipulative experiments)	Sala et al. 2011; Yeruham et al., 2020
	Siganus rivulatus	0	0	0	0	0	0	8	0	0	0	massive (Can overgraze and deplete algal vegetation of shallow rocky reefs to the point that they shift the ecosystem state from algal forests to isolated barren grounds or turf-dominated communities of low complexity); high strength of evidence (manipulative experiments)	Sala et al. 2011; Yeruham et al., 2020
	Sargocentron rubrum	0	0	1	0	0	0	0	0	0	0	major (can affect trophic flows in submarine caves); low strength of evidence	Otero et al. 2013; Gerovasileiou et al. 2016
	Pempheris rhomboidea	0	0	1	0	0	0	0	0	0	0	major (can affect trophic flows in submarine caves); low strength of evidence	Otero et al. 2013; Gerovasileiou et al. 2016
	Upeneus pori	0	0	0	1	0	0	0	0	0	0	minor to moderate (can compete and negatively affect native species for resources); medium strength of evidence	Otero et al., 2013; Arndt et al., 2018
	Parupeneus forsskalli	0	0	0	1	0	0	0	0	0	0	moderate (can compete and negatively affect native species for resources); medium strength of evidence	Evangelopoulos et al., 2020
Invertebrates	Mnemiopsis leidyi	0	0	0	0	0	0	0	0	0	4	major (This ctenophore is a predatory species that opportunistically feeds on small planktonic organisms with low swimming velocities, such as gastropod larvae and cirriped nauplii. Its voracious feeding behavior can result in significant changes in zooplankton communities); high strength of evidence (Natural experiment)	Fiori et al., 2019; Marchessaux et al., 2021
	Callinectes sapidus	0	0	0	1	0	0	0	0	0	0	moderate (Abundant populations of the blue crab may exert significant predation pressure on native species and cause population declines); medium strength of evidence (non-experimental based correlations)	Kampouris et al., 2019
	Oculina patagonica	0	0	0	0	0	0	2	0	0	0	major (The species can form encrusting colonies that compete for space with sessile species, and can overgrows many sessile invertebrates. The formed colonies diminish structural complexity and species richness); medium strength of evidence (non-experimental based correlations, direct observations)	Coma et al., 2011; Serrano et al., 2012; Katsanevakis et al., 2014
	Amathia verticillata	0	0	0	0	0	0	1	0	0	0	major (Usually found inside ports, can form seasonally abundant and dense bushy colonies that extensively cover the substrate creating novel habitats that become a dominant feature); limited strength of evidence (expert judgement)	Marchini et al., 2015; McCann et al., 2015
	Hydroides elegans	0	0	0	0	0	0	4	0	0	0	Major (H. elegans is an invasive serpulid that fouls on hard substrates, mainly on eutrophic environments and artificial surfaces, creating dense aggregations of calcified tubes. It forms dense aggregations of calcified tubes, and its population density can reach as high as 110,700 individuals per square meter in the Mediterranean.This species can compete with native benthic species for space and…	Çinar et al. 2008; Fortič et al., 2021
	Brachidontes pharaonis	0	0	0	0	0	0	4	0	0	0	major (it forms habitas with dense populations that have a significant impact on the benthic communities of shallow rocky reefs; it outcompetes native species for space and resources and dominates the community); high strength of evidence (manipulative and natural experiments), medium stregth of evidence (non-experimental-based correlations)	Safriel and Sasson-Frosting 1988; Rilov and Galil 2009; Bonnici et al., 2012; Sarà et al. 2013
	Pinctada radiata	0	0	0	0	0	0	1	0	0	0	major (It can form reefs that completely alter habitat structure and impact native fauna, outcompeting native filter-feeding species for food resources and space); low strength of evidence (expert judgement)	Otero 2013; Katsanevakis et al., 2014; Ounifi Ben Amor et al., 2016
	Conomurex persicus	0	0	0	1	0	0	0	0	0	0	major (can form overabundant invasive populations that compete with native species for resources); limited strength of evidence (expert judgement)	Mutlu and Hergev, 2006; Crocetta et al., 2017; Zenetos et al., 2018
	Styela plicata	0	0	0	0	0	0	4	0	0	0	major (it has been reported to overgrow large surface areas and outcompete native species); high strength of evidence (manipulative experiments), moderate strength of evidence (direct observations)	Katsanevakis et al., 2014; Pica et al., 2019
	Amphistegina lobifera	0	0	0	2	0	0	0	0	0	0	major (affects native epifaunal communities by establishing abundant populations that dominate and alter community structure); medium strength of evidence (non-experimental based correlations)	Mounaga and Langer 2014; Caruso and Cosentino, 2014; Mouanga, 2018

## Sheet: Scoring protocol
		Impact magnitude
		Minimal	Minor	Moderate	Major	Massive
Strength of evidence	Robust	0	1	2	4	8
	Medium	0	0	1	2	4
	Limited	0	0	0	1	2
								Strength of evidence
								Robust	The impact is estimated by experimental studies. The different types of experiments are Manipulative Experiments (field and lab experiments based on a random selection of experimental units and include treatments and controls) and Natural Experiments (field experiments based on natural selection of experimental units).
								Medium	Impact assessment is derived from Direct Observations (direct observations or measurements of impact without doubt), Modelling (ecosystem models that simulate alien species impacts on biodiversity) and non-experimental based correlations (significant correlations between an alien species and an impact on native biodiversity, not based on an experimental design).
								Limited	Qualitative Impact assessment based on Expert Judgement through the empirical knowledge of experts based on alien species’ traits.
								Impact magnitude
								Massive	Changes in community composition through local or global extinction (negative) because of competition, predation, grazing, parasitism, toxicity or bio-fouling; impact on ecosystem processes and ecosystem functioning resulting in species composition changes; or ecological engineering, resulting in change in community composition. Massive magnitude applies when under the hypothetical scenario of th…
								Major	Changes in community composition through local or global extinction (negative) because of competition, predation, grazing, parasitism, toxicity or bio-fouling; impact on ecosystem processes and ecosystem functioning resulting in species composition changes; or ecological engineering, resulting in change in community composition. Major magnitude applies when under the hypothetical scenario of the …
								Moderate	Native species population changes due to competition, predation, grazing, parasitism, toxicity or bio-fouling, but without changes in community composition; or impact on ecosystem processes and ecosystem functioning resulting in population declines but no substantial change in community composition; or ecological engineering, resulting in population declines but no substantial change in community…
								Minor	Impact on individual fitness of a native species due to competition, predation, grazing, parasitism, toxicity or bio-fouling without substantial population changes; minor impact on ecosystem processes and ecosystem functioning with no related population changes; any environmental or habitat alterations in chemical, physical or structural characteristics do not result in population changes.
								Minimal	No effect on fitness of native species; negligible impact on native species due to competition, predation, grazing, parasitism, toxicity or bio-fouling; no effects on ecosystem processes and ecosystem functioning; no chemical, physical or structural impact on the ecosystem (not an ecosystem engineer).
